# Supplementary material
Source: PubMed Central journal article supplement (PMC2727710)

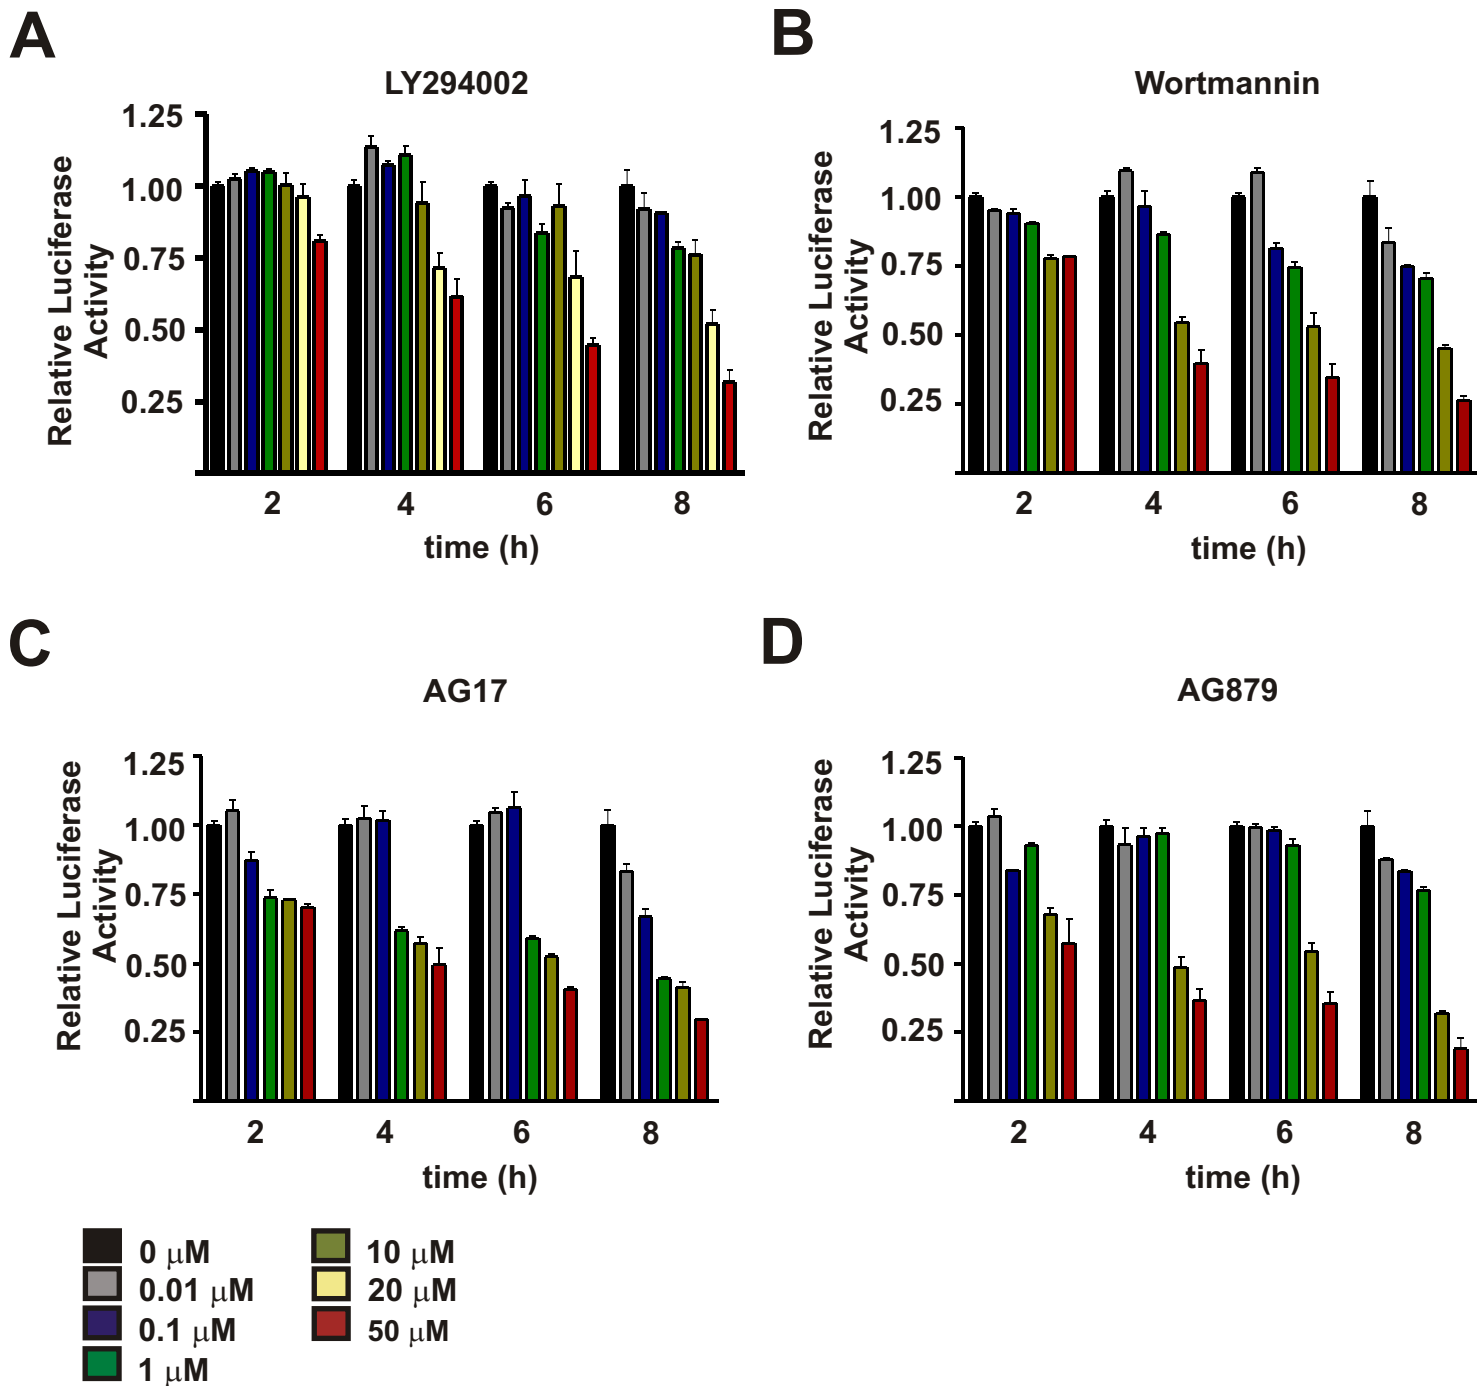

Supplementary Figure 1

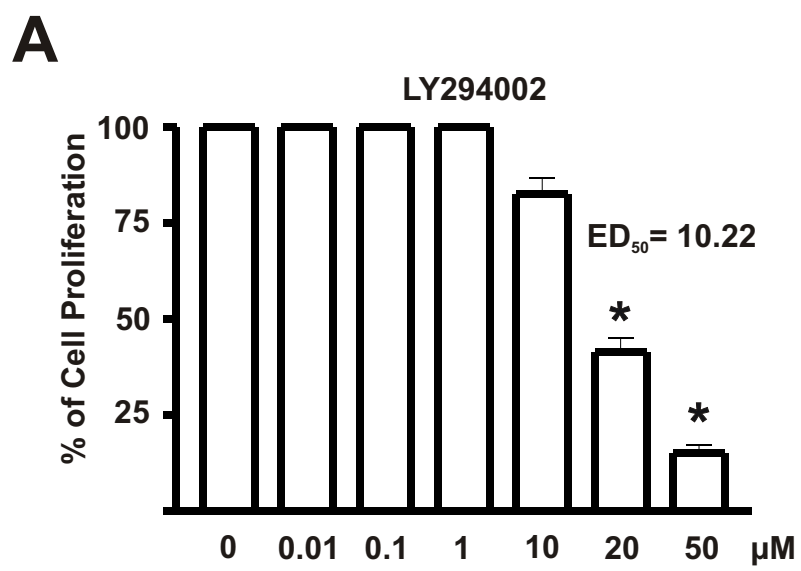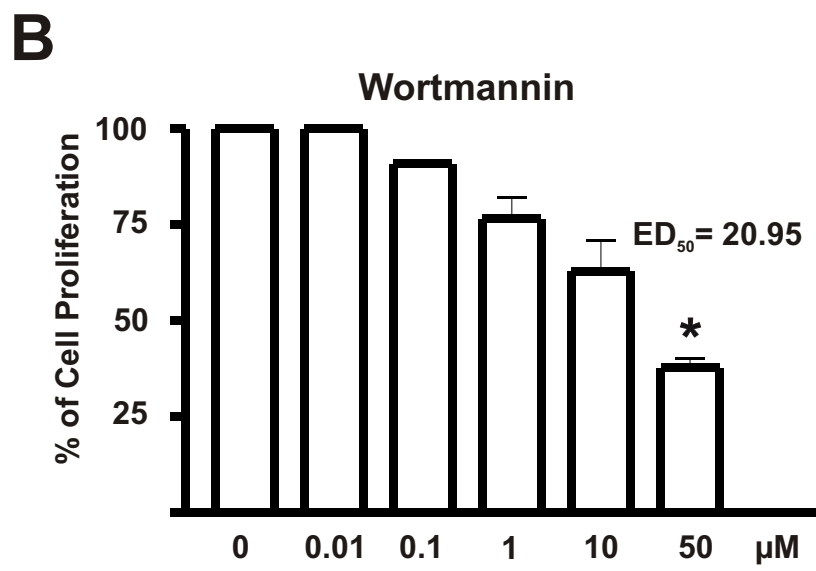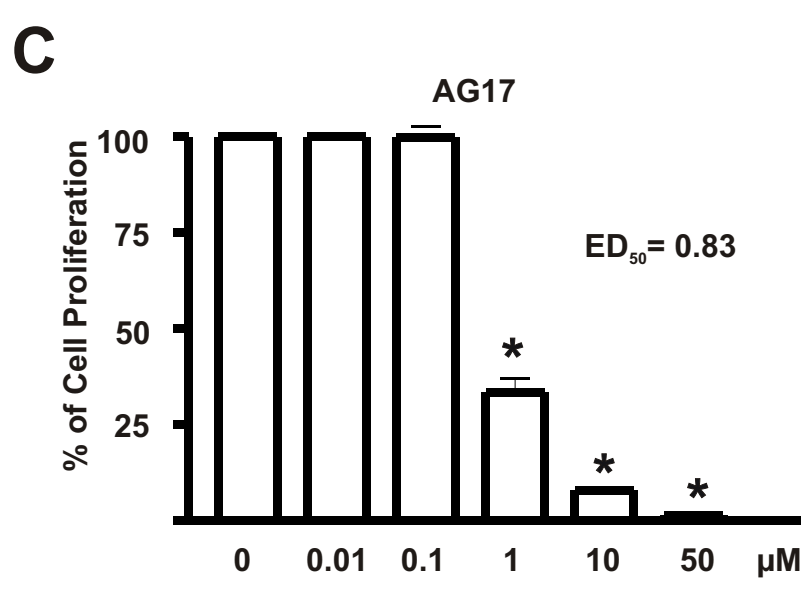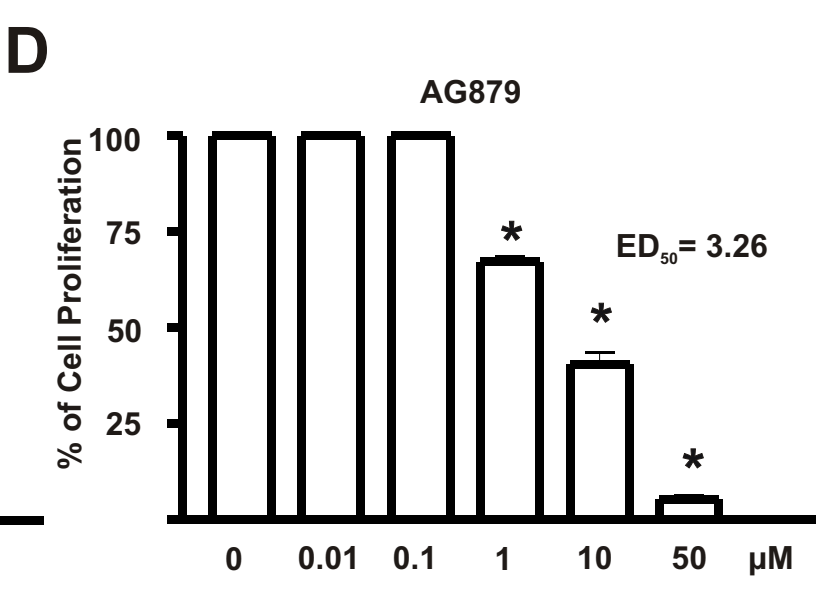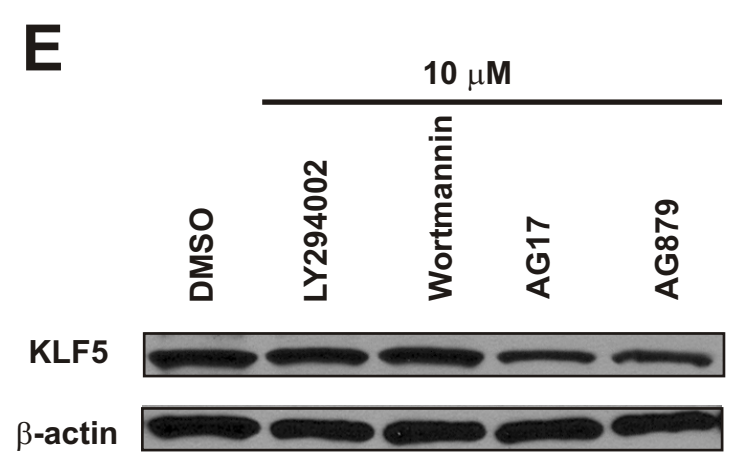

Supplementary Figure 2

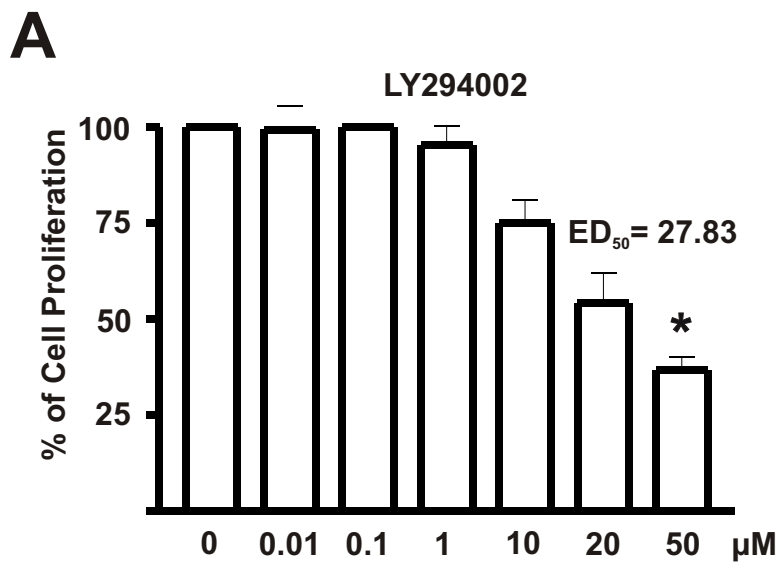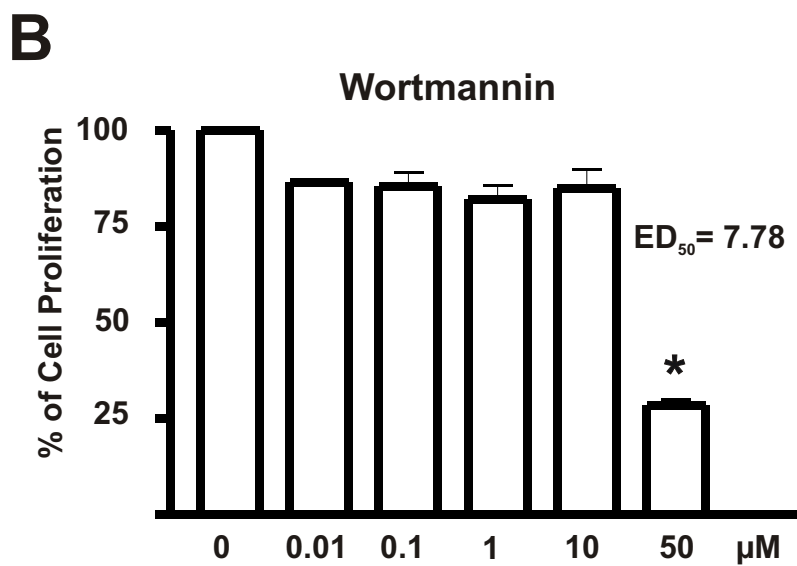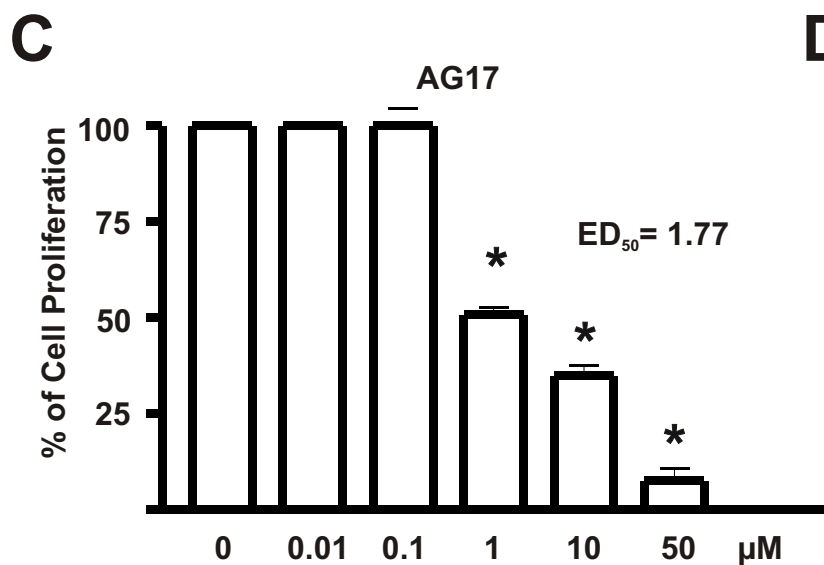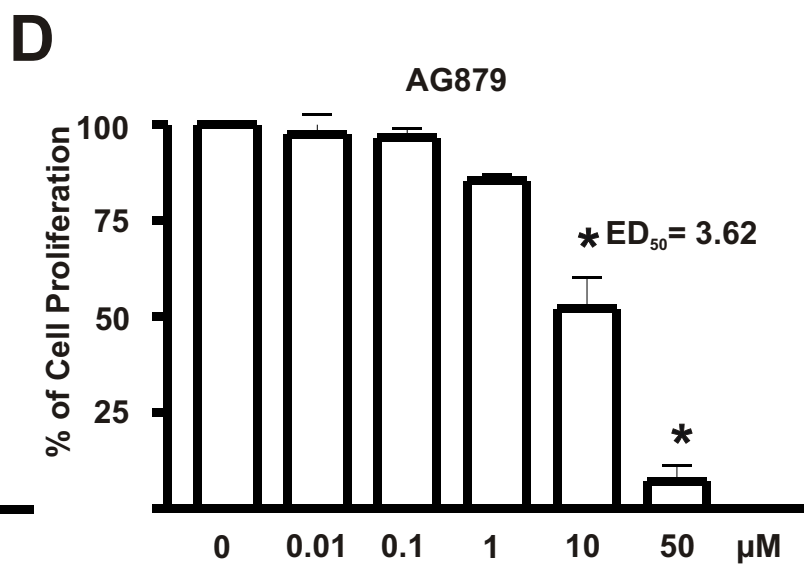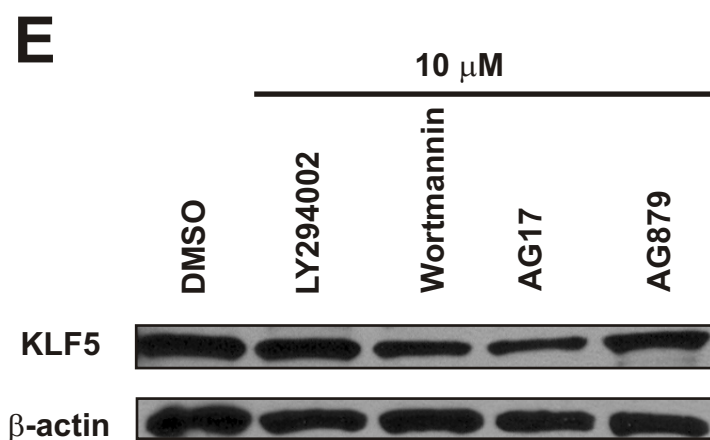

Supplementary Figure 3

Supplement: NIHMS102120-supplement-Supplementary.pdf [file NIHMS102120-supplement-Supplementary.pdf]
